# Supplementary material
Source: Springer Nature journal article supplement (https://www.springermedizin.de/resource/supplementary/13045_2010_129_MOESM1_ESM.pdf/9660718)

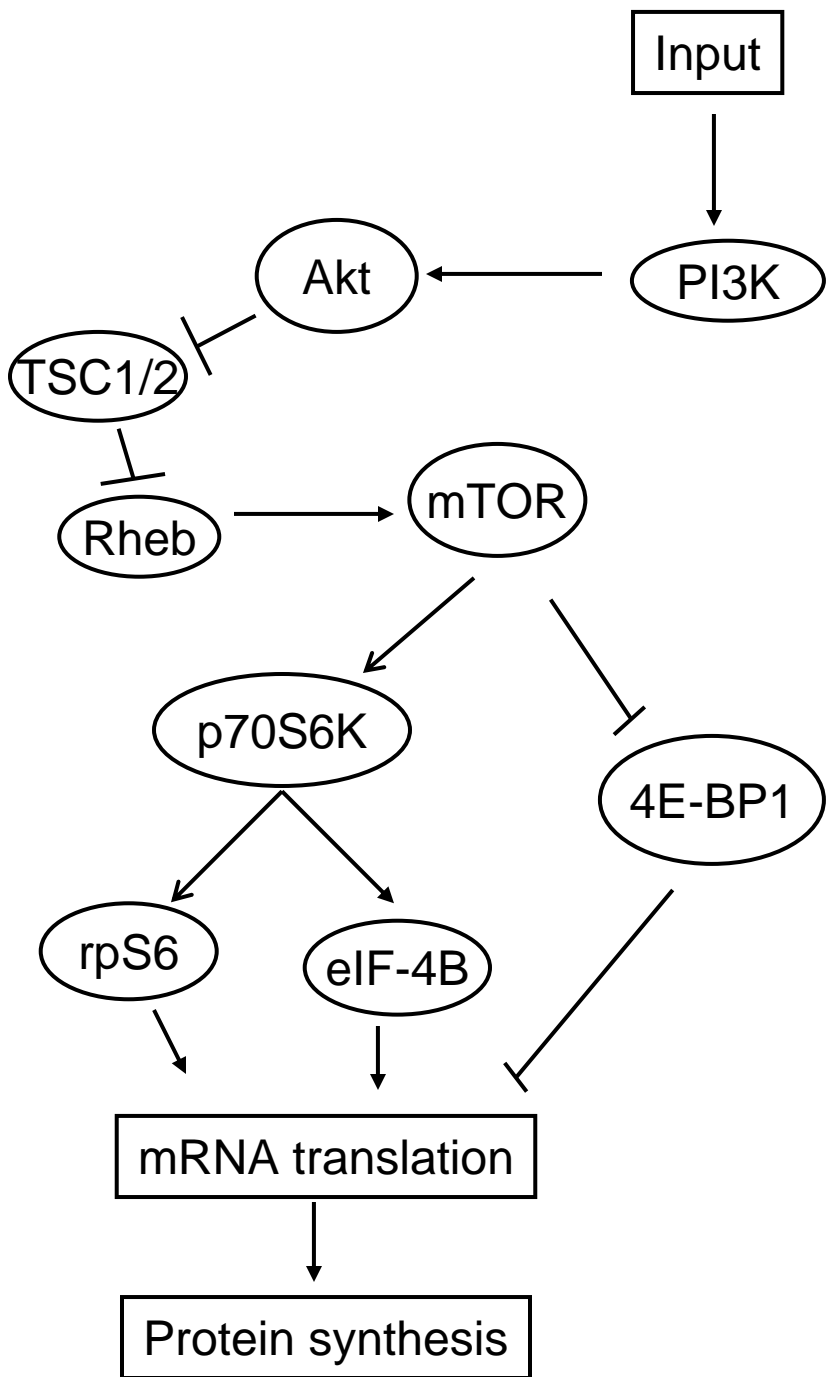

Supplement: MOESM1 [file 9660718]
